# Supplementary material
Source: Research Square preprint supplement (doi:10.21203/rs.3.rs-9415250/v1)
Supplement: Supplementary file 1 [file 7ce37c4544c0f763d584e551.pdf]

# Supplementary Information: FuXi-TC

Shan Guo<sup>2†</sup>, Lei Chen<sup>1,2†</sup>, Yangyang Zhao<sup>1,2</sup>, Yuetan Lin<sup>1</sup>,  
Zeyi Niu<sup>3,4</sup>, Xinyan Zhang<sup>3</sup>, Ziyao Sun<sup>3,4</sup>, Xiaohui Zhong<sup>1,2\*</sup>,  
Hao Li<sup>1,2\*</sup>

<sup>1</sup>Artificial Intelligence Innovation and Incubation Institute, Fudan  
University, Shanghai, 200433, China.

<sup>2</sup>Shanghai Academy of Artificial Intelligence for Science, Shanghai,  
200232, China.

<sup>3</sup>Department of Atmospheric and Oceanic Sciences, Institute of  
Atmospheric Sciences, Fudan University, Shanghai, 200433, China.

<sup>4</sup>Shanghai Typhoon Institute, China Meteorological Administration,  
Shanghai, 200030, China.

\*Corresponding author(s). E-mail(s): [x7zhong@gmail.com](mailto:x7zhong@gmail.com);  
[lihao\\_lh@fudan.edu.cn](mailto:lihao_lh@fudan.edu.cn);

Contributing authors: [guoshan@sais.org.cn](mailto:guoshan@sais.org.cn); [cltpys@163.com](mailto:cltpys@163.com);  
[zhaoyangyang@sais.org.cn](mailto:zhaoyangyang@sais.org.cn); [linyuetan@sais.org.cn](mailto:linyuetan@sais.org.cn);  
[niuzy@typhoon.org.cn](mailto:niuzy@typhoon.org.cn); [zhangxy@typhoon.org.cn](mailto:zhangxy@typhoon.org.cn);  
[sunzy@typhoon.org.cn](mailto:sunzy@typhoon.org.cn);

†These authors contributed equally to this work.

## 1 Tropical cyclone cases

Table 1 lists the tropical cyclone (TC) cases evaluated in both the Western North Pacific (WNP) and North Atlantic (NA) basins. For each storm, the storm identifier (SID) from International Best Track Archive for Climate Stewardship (IBTrACS) and the corresponding first and last forecast initialization times (UTC) are provided. All cases occurred in 2024. The inclusion of 17 WNP and 15 NA storms ensures coverage of diverse dynamical regimes and basin-dependent characteristics. By evaluating multiple initialization times for each TC, we systematically assess forecast performance across different lead times and storm development stages, thereby enabling a comprehensive validation of the proposed framework.

**Table 1** List of TC names, TC SID and their first and last initialization times (in UTC) in WNP and NA Basins evaluated in this study. All dates refer to the year 2024.

| Basin    | TC Name       | TC SID        | First Init Time | Last Init Time | Init Times |
|----------|---------------|---------------|-----------------|----------------|------------|
| WNP      | GAEMI         | 2024201N12133 | 20 Jul, 1200    | 25 Jul, 1200   | 11         |
|          | PRAPIROON     | 2024201N14118 | 21 Jul, 1200    | 22 Jul, 1200   | 3          |
|          | MARIA         | 2024218N24141 | 08 Aug, 0000    | 12 Aug, 0000   | 9          |
|          | SON-TINH      | 2024224N27154 | 12 Aug, 0000    | 12 Aug, 0000   | 1          |
|          | AMPIL         | 2024225N22135 | 13 Aug, 0000    | 18 Aug, 0000   | 11         |
|          | WUKONG        | 2024225N24147 | 13 Aug, 1200    | 13 Aug, 1200   | 1          |
|          | JONGDARI      | 2024231N24126 | 19 Aug, 0000    | 19 Aug, 1200   | 2          |
|          | SHANSHAN      | 2024233N15148 | 22 Aug, 0000    | 29 Aug, 0000   | 15         |
|          | YAGI          | 2024245N12129 | 01 Sep, 1200    | 07 Sep, 1200   | 13         |
|          | LEEPI         | 2024246N22147 | 05 Sep, 1200    | 05 Sep, 1200   | 1          |
|          | BEBINCA       | 2024254N10148 | 10 Sep, 1200    | 16 Sep, 1200   | 13         |
|          | PULASAN       | 2024259N12145 | 15 Sep, 1200    | 20 Sep, 1200   | 11         |
|          | JEBI          | 2024270N15149 | 27 Sep, 1200    | 01 Oct, 1200   | 8          |
|          | KRATHON       | 2024271N22127 | 28 Sep, 0000    | 02 Oct, 1200   | 10         |
|          | BARIJAT       | 2024279N12148 | 09 Oct, 1200    | 10 Oct, 1200   | 3          |
|          | TRAMI         | 2024293N13141 | 22 Oct, 0000    | 27 Oct, 0000   | 11         |
| KONG-REY | 2024298N13150 | 25 Oct, 0000  | 31 Oct, 1200    | 13             |            |
| NA       | BERYL         | 2024181N09320 | 29 Jun, 0000    | 08 Jul, 1200   | 20         |
|          | DEBBY         | 2024216N20284 | 04 Aug, 0000    | 09 Aug, 1200   | 11         |
|          | ERNESTO       | 2024225N14313 | 13 Aug, 0000    | 20 Aug, 0000   | 15         |
|          | FRANCINE      | 2024253N21266 | 10 Sep, 0000    | 12 Sep, 1200   | 6          |
|          | GORDON        | 2024256N16332 | 13 Sep, 1200    | 17 Sep, 0000   | 8          |
|          | HELENE        | 2024268N17278 | 25 Sep, 0000    | 28 Sep, 0000   | 7          |
|          | ISAAC         | 2024269N39302 | 26 Sep, 1200    | 30 Sep, 1200   | 9          |
|          | JOYCE         | 2024271N17319 | 27 Sep, 1200    | 29 Sep, 1200   | 5          |
|          | KIRK          | 2024274N14328 | 01 Oct, 0000    | 08 Oct, 0000   | 15         |
|          | LESLIE        | 2024275N10336 | 03 Oct, 0000    | 12 Oct, 0000   | 19         |
|          | MILTON        | 2024279N21265 | 06 Oct, 0000    | 11 Oct, 0000   | 11         |
|          | NADINE        | 2024293N17275 | 19 Oct, 1200    | 20 Oct, 0000   | 2          |
|          | OSCAR         | 2024293N21294 | 20 Oct, 0000    | 22 Oct, 0000   | 5          |
|          | PATTY         | 2024306N39319 | 02 Nov, 1200    | 04 Nov, 0000   | 3          |
| RAFAEL   | 2024309N13283 | 05 Nov, 0000  | 10 Nov, 0000    | 11             |            |

## 30 2 Comparison between WRF- $^{\circ}$ and WRF- $^{\circ}$

31 We evaluated the model sensitivity to horizontal resolution by comparing simulations  
32 at  $0.25^{\circ}$  and  $0.1^{\circ}$  using identical physical configurations from April to October in  
33 2023. Supplementary Figure 1 illustrates while track forecast accuracy remains similar  
34 between the two resolutions, the WRF- $0.1^{\circ}$  configuration demonstrates significantly  
35 superior performance in predicting TC intensity compared to WRF- $0.25^{\circ}$ .

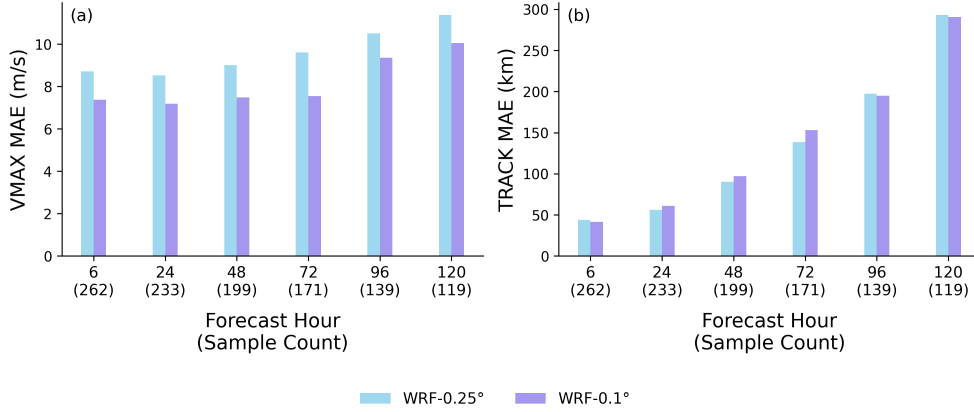

**Fig. 1** Comparison of TC intensity and track forecasts between WRF simulations at different resolutions with IBTrACS dataset as ground truth. Mean absolute error (MAE) of maximum sustained wind and tracks with forecast lead time for WRF-0.25° (blue columns), WRF-0.1° (purple columns).

### 3 Spatial distribution of observed precipitation event counts

Figure 2 illustrates the spatial distribution of Automatic Weather Station (AWS)-based precipitation event statistics for rainfall exceeding 0.1 mm from July to September 2024 and their temporal variations across different forecast lead times. Given that the experiments were initialized at 00 and 12 UTC, this figure reveals that the volume of precipitation data received from AWS at 00 and 12 UTC is significantly larger than that available at 06 and 18 UTC.

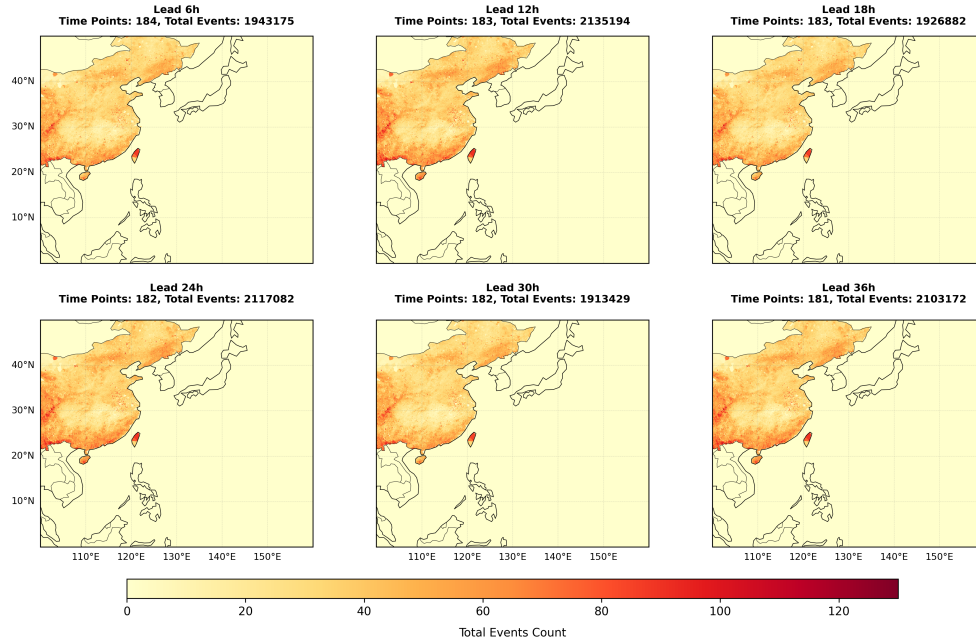

**Fig. 2** Spatial distribution of observed precipitation event counts with a threshold of 0.1 mm by forecast lead time during July–September 2024.

#### 44 **4 Prediction of 2024 Typhoon Bebinca**

45 Supplementary Figure 3 shows the 24-hour accumulated precipitation observation  
 46 from AWS and forecasts initialized at 12 UTC on 14 September 2024. The compar-  
 47 ison covers forecast lead times of 24-48, 48-72, 72-96 and 96-120 hours. These  
 48 precipitation events encompass the rainfall over land induced by Typhoon Bebinca  
 49 and Tropical Storm Pulasan. Notably, Bebinca was the strongest typhoon to make  
 50 landfall in Shanghai since 1949, followed by Tropical Storm Pulasan, which made a  
 51 subsequent landfall in Shanghai just four days later [1]. According to observations,  
 52 Bebinca triggered heavy to torrential rainfall extending from the eastern coast to Cen-  
 53 tral China, while Pulasan produced heavy rainfall with localized torrential downpours  
 54 along the southeastern coast. Regarding models' performance, the FuXi model gener-  
 55 ally underestimates precipitation intensity. HRES-0.1° exhibits spatial displacement  
 56 during the 48–72 h and 72–96 h intervals. However, FuXi-TC-0.1° inherits the precise  
 57 spatial positioning of FuXi while demonstrating significant improvements in capturing  
 58 precipitation intensity.

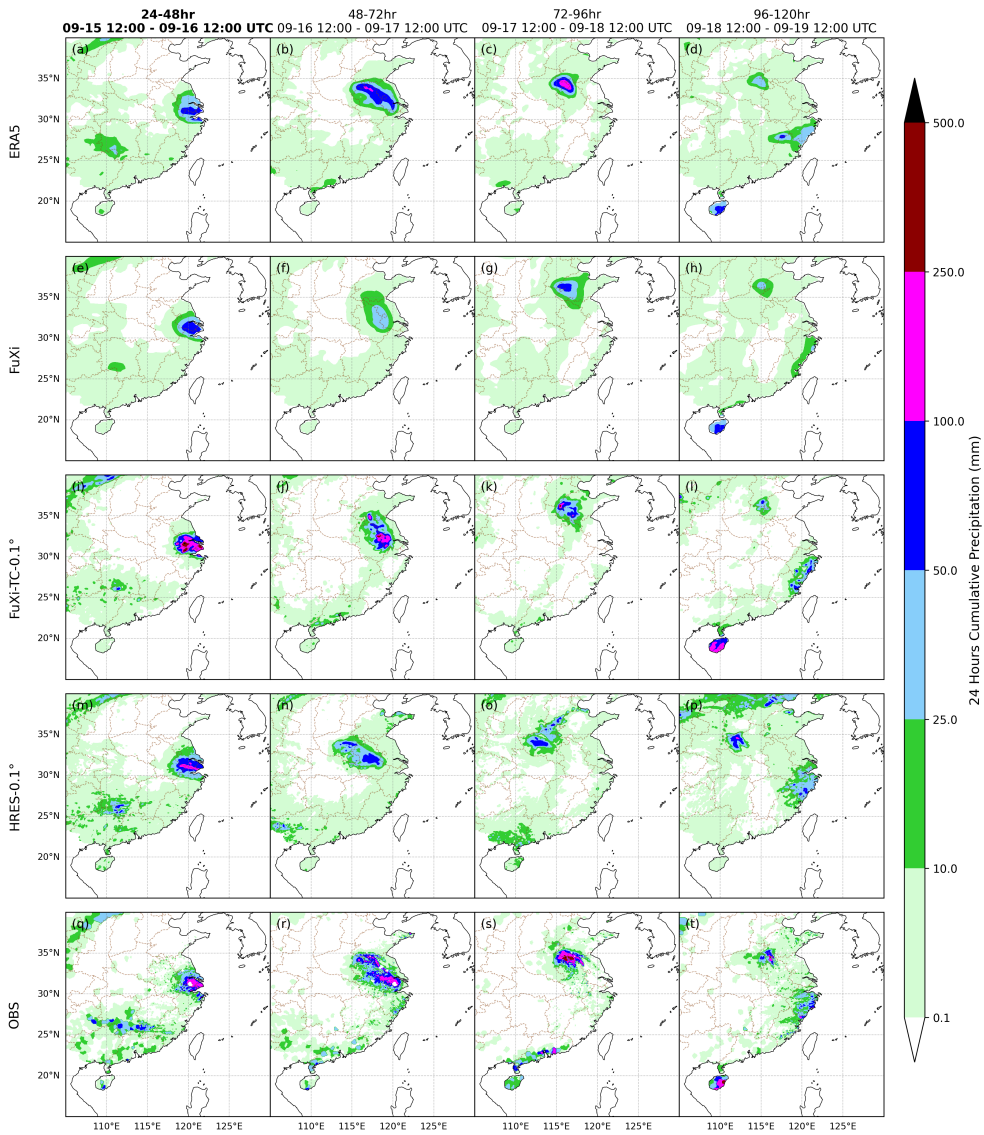

**Fig. 3** Comparison of total precipitation (TP) for Typhoon Bebinca and Tropical Storm Pulasan forecasts. Comparison of snapshot examples of 24-hour accumulated TP among ERA5 (first row), FuXi (second row), FuXi-TC-0.1° (third row), HRES-0.1° (fourth row) and the AWS observations (fifth row) mainland China for 24-48 (first column), 48-72 (second column), 72-96 (third column) and 96-120 (fourth column) hours forecasts with the initial forecasting time at 12:00 UTC 14 September 2024.

59       Supplementary Figure 4 presents a comparison of forecast tracks for Typhoon  
60       Bebinca among FuXi-ENS, FuXi-TC-ENS, and ECMWF-ENS across different ini-  
61       tialization times. Notably, the differences between the ensemble mean tracks of  
62       FuXi-TC-ENS and FuXi-ENS are negligible. This is attributed to the fact that  
63       the post-processing framework primarily adjusts typhoon intensity and exerts min-  
64       imal influence on the track. Regarding TC track forecasts, ECMWF-ENS exhibits  
65       slightly inferior performance in this case study compared to both FuXi-ENS and  
66       FuXi-TC-ENS, particularly for forecasts initialized 5 to 6 days in advance.

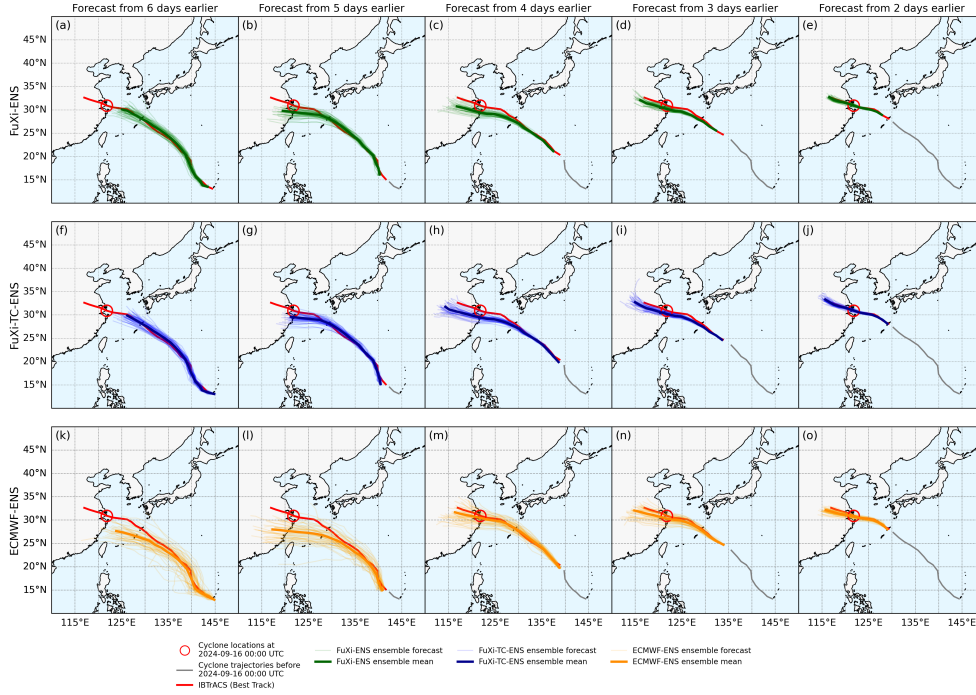

**Fig. 4** Tracking results for Typhoon Bebinca from ERA5 (red line) and ensemble forecasts generated by FuXi-ENS (first row, green line), FuXi-TC-ENS (second row, blue line) and ECMWF-ENS (third row, orange line). The columns show forecasts initialized at 12:00 UTC on 10, 11, 12, 13, and 14 September 2024 (from left to right), corresponding to 6, 5, 4, 3, and 2 days before landfall, respectively. The gray line represents the observed track prior to each forecast initialization time, and the red circle indicates the landfall location.

## 5 Overall precipitation evaluation in WNP

67

68 Supplementary Figure 5 and 6 present the time series of Probability of Detection  
 69 (POD) and False Alarm Ratio (FAR) for 6-hour accumulated TP across varying  
 70 thresholds from 0.1 mm to 40 mm. POD reflects the model's sensitivity to observed  
 71 precipitation events, while FAR indicates the propensity for false alarms. In terms of  
 72 model performance, FuXi performs well at the lowest threshold. However, at higher  
 73 thresholds, both its POD and FAR decrease significantly, a trend attributed to the  
 74 model's general tendency to underestimate precipitation intensity. Notably, in the  
 75 evaluation for TP at 40 mm threshold, FuXi's FAR exhibits large fluctuations, likely  
 76 due to the insufficient sample size of extreme precipitation events predicted by FuXi.  
 77 Comparatively, HRES-0.1° demonstrates a relatively stable trade-off between POD  
 78 and FAR across thresholds. Both WRF-0.1° and FuXi-TC-0.1° show superiority at  
 79 higher precipitation thresholds. WRF-0.1° exhibits a higher FAR at thresholds above  
 80 0.1 mm, possibly due to a systematic wet bias in the numerical model. During the initial  
 81 forecast period, both POD and FAR are relatively low for WRF-0.1° , reflecting  
 82 the spin-up process during which precipitation is not fully developed.

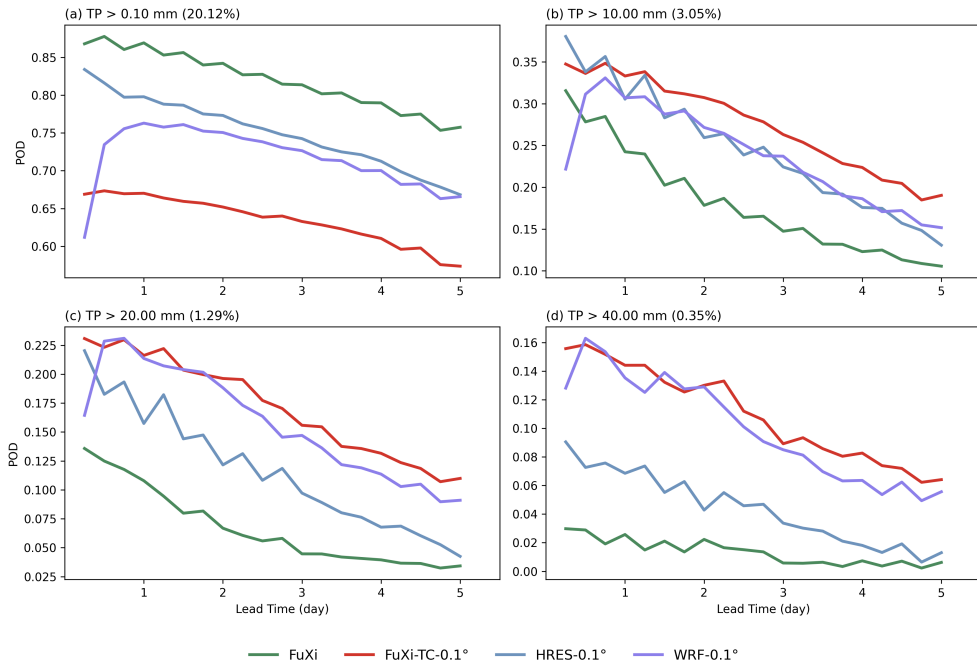

**Fig. 5** Comparison of POD for TP. Comparison for the FuXi(green lines), FuXi-TC-0.1°(red lines), HRES-0.1°(blue lines) and WRF-0.1°(purple lines) in predicting 6-hour precipitation for 0.1, 10, 20, 40 mm thresholds in (a-d) respectively. The ratios of extreme cases relative to the entire test set are indicated in parentheses. All the forecast data are evaluated against the Automatic Weather Station observations in period 1 July to 30 September 2024.

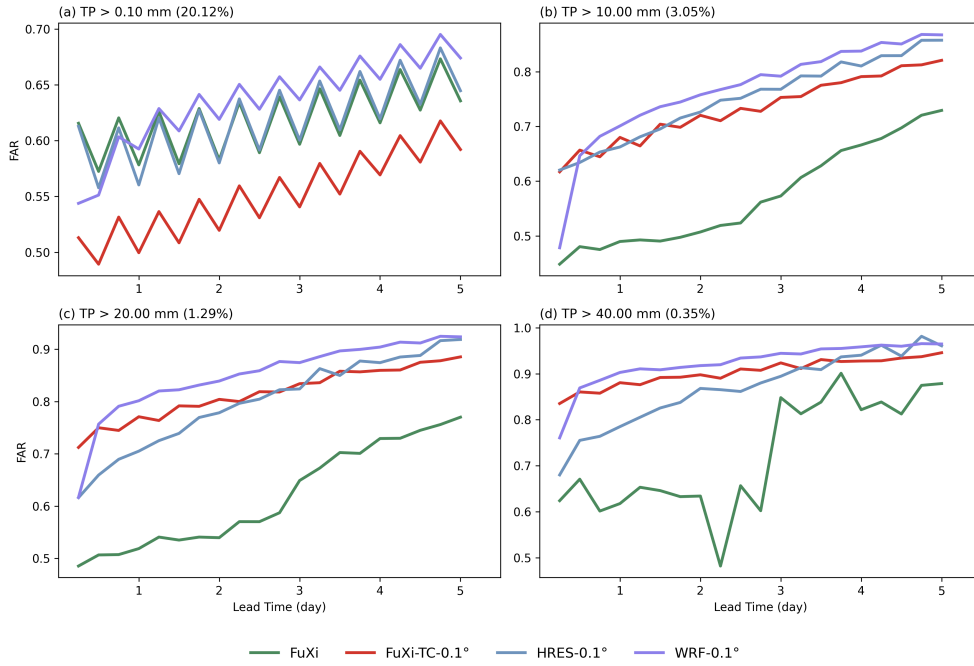

**Fig. 6** Comparison of FAR for TP. Comparison for the FuXi (green lines), FuXi-TC-0.1° (red lines), HRES-0.1° (blue lines) and WRF-0.1° (purple lines) in predicting 6-hour precipitation for 0.1, 10, 20, 40 mm thresholds in (a-d) respectively. The ratios of extreme cases relative to the entire test set are indicated in parentheses. All the forecast data are evaluated against the Automatic Weather Station observations in period 1 July to 30 September 2024.

## 83 6 Energy spectra

84 We employed kinetic energy spectra to evaluate the effective resolution and smoothness  
85 of the model outputs. By decomposing the kinetic energy into spectral components,  
86 we assessed the model’s ability to preserve variance across different scales. Generally,  
87 spectral energy exhibits a power-law decay as wavelengths decrease, reflecting the  
88 energy cascade from organized large-scale circulation to smaller-scale turbulent pro-  
89 cesses. Supplementary Figure 7 presents energy spectra within the WNP domain for  
90 10-meter wind speed (WS10M) and mean sea level pressure (MSL) across 24, 72, 120  
91 hours forecast lead times. The  $0.1^\circ$ -resolution models exhibit distinct spectral char-  
92 acteristics compared to their  $0.25^\circ$  counterparts. FuXi achieves remarkable alignment  
93 with European Centre for Medium-Range Weather Forecasts Reanalysis v5 (ERA5)  
94 across all scales and surface variables. Notably, FuXi-TC- $0.1^\circ$  significantly outper-  
95 forms the FuXi. At smaller wavelengths, FuXi-TC- $0.1^\circ$  initially aligns with WRF- $0.1^\circ$   
96 but shows slightly reduced energy with increasing wavenumber, suggesting smoother  
97 forecasts and a loss of fine-scale details for WS10M. However, for MSL, FuXi-TC-  
98  $0.1^\circ$  indicates superior consistency with WRF- $0.1^\circ$ , suggesting that the model is more  
99 capable of capturing small-scale features and details for this variable.

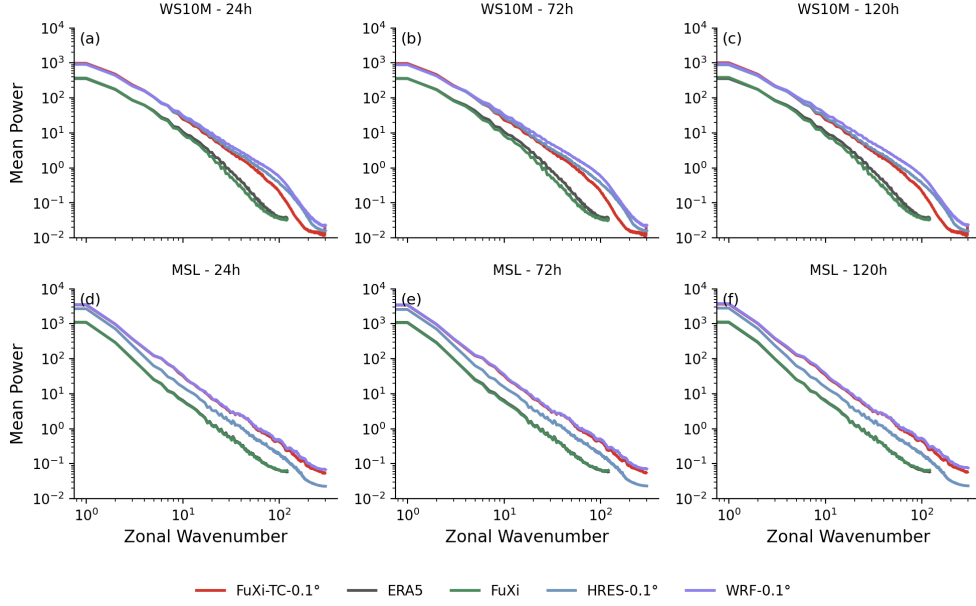

**Fig. 7** Energy spectra of FuXi-TC-0.1° (red lines), ERA5 (black lines), FuXi (green lines), HRES-0.1° (blue lines) and WRF-0.1° (purple lines). The figure includes WS10M (first row) and MSL (second row). The spectra are shown at forecast lead times of 24 hours (first column), 72 hours (second column) and 120 hours (third column), using the dataset from July to October 2024.

## 100 7 Overall MSL evaluation in WNP and NA

101 Supplementary Figure 8 presents the overall MAE of the MSL for TCs in both the  
 102 WNP and NA basins. In the WNP, FuXi-TC-0.1° demonstrates a significant improve-  
 103 ment in MSL accuracy over the original FuXi model across all lead times. For lead  
 104 times within the first 48 hours, its performance is comparable to that of WRF-0.1°.  
 105 However, since WRF-0.1° exhibits a higher MAE than HRES-0.1°, HRES-0.1° remains  
 106 the superior performer overall. The improvement in MSL accuracy relative to FuXi  
 107 remains robust in different regions, which demonstrates that the FuXi-TC framework  
 108 can be directly applied to the NA basin without retraining using WRF-0.1° data.

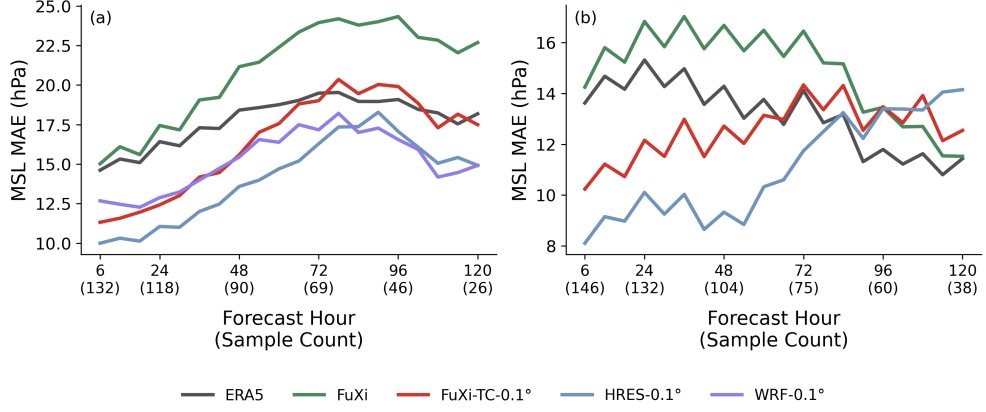

**Fig. 8** Comparison of the average MAE for MSL in WNP (a) and NA (b) with forecast lead time for ERA5 (black lines), FuXi (green lines), FuXi-TC-0.1° (red lines), HRES-0.1° (blue lines) and WRF-0.1° (purple lines). All the forecast data are evaluated against the IBTrACS dataset. The evaluation covers forecasts for 17 TCs in WNP from July to October 2024, and 15 TCs in NA from June to December.

## 109 8 Wind speed prediction comparison of tropical 110 cyclones cases in NA

111 We present the forecast evolution characteristics of WS10M for Hurricanes Beryl (ini-  
112 tial forecasting time at 12:00 UTC, 2 July 2024) and Helene (initial forecasting time  
113 at 00:00 UTC, 25 September 2024) in Figures 9 and 10. The three rows of the figures  
114 sequentially compare the forecast snapshots of ERA5, FuXi, and FuXi-TC-0.1°, while  
115 the four columns correspond to the 12-, 24-, 36-, and 48-hour forecast results, respec-  
116 tively. It can be observed that FuXi-TC-0.1° significantly increase the predicted values  
117 of WS10M while maintaining the consistency of the cyclone center structure with FuXi.

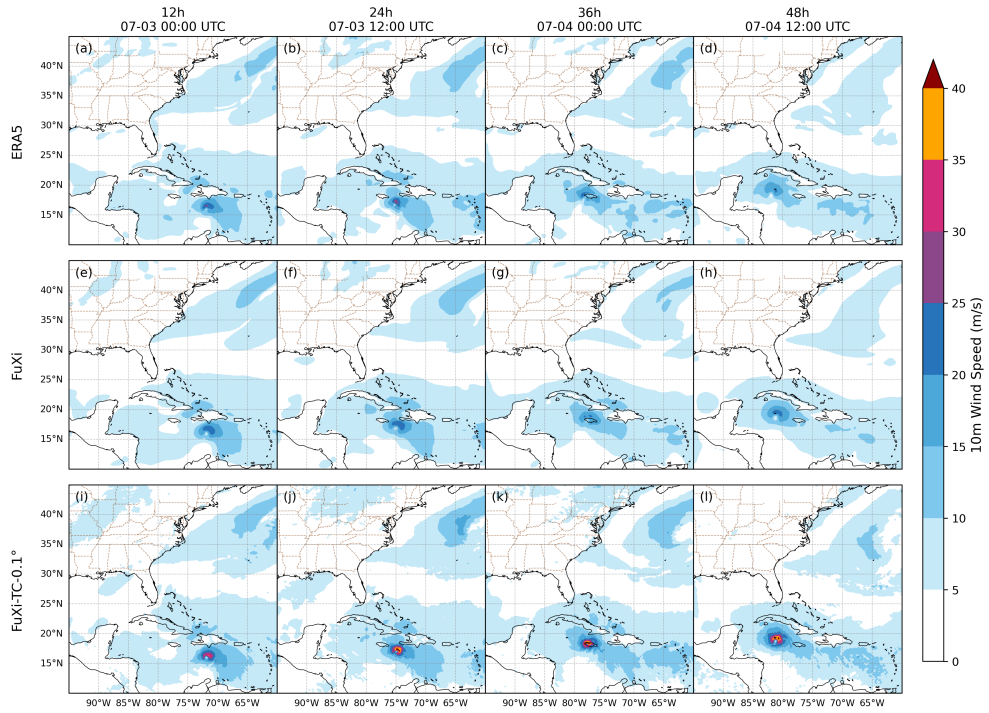

**Fig. 9** Comparison of WS10M for Hurricane Beryl forecast. Comparison of snapshot examples of WS10M among ERA5 (first row), FuXi (second row) and FuXi-TC-0.1° (third row) for 12 (first column), 24 (second column), 36 (third column) and 48 (fourth row) hours forecasts with the initial forecasting time at 12:00 UTC, 2 July, 2024.

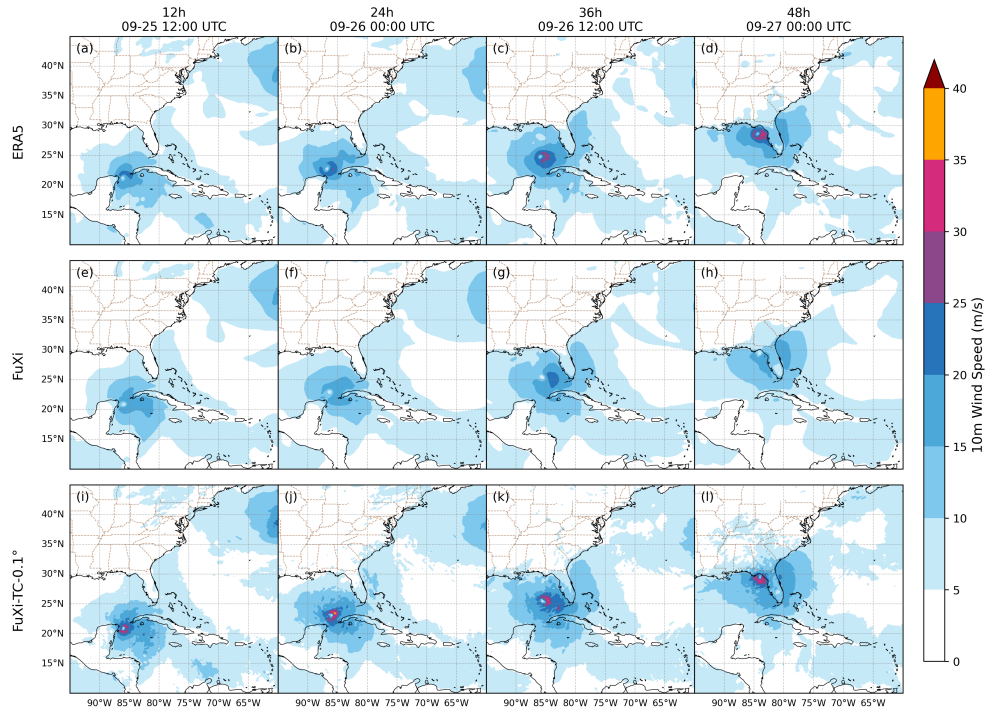

**Fig. 10** Comparison of WS10M for Hurricane Helene forecast. Comparison of snapshot examples of WS10M among ERA5 (first row), FuXi (second row) and FuXi-TC-0.1° (third row) for 12 (first column), 24 (second column), 36 (third column) and 48 (fourth row) hours forecasts with the initial forecasting time at 00:00 UTC, 25 September, 2024.

## 118 **9 Domain setup and TC track forecasts in the WNP** 119 **and NA Basins**

120 Supplementary Figure 11 illustrates the domain configurations used for the WNP and  
121 NA basins. To accommodate the broader longitudinal span of the NA basin while  
122 maintaining consistent input dimensions, the NA domain is constructed by horizon-  
123 tally concatenating two sub-domains. Each of these NA sub-domains is identical in  
124 size to the WNP domain. Specifically, the western NA sub-domain spans  $99.2^{\circ}\text{W}$ -  
125  $40.1^{\circ}\text{W}$  and  $5.5^{\circ}\text{N}$ - $55^{\circ}\text{N}$  while the eastern NA sub-domain spans  $59.8^{\circ}\text{W}$ - $0.1^{\circ}\text{W}$  and  
126  $5.5^{\circ}\text{N}$ - $55^{\circ}\text{N}$ . In the overlapping region between the two NA sub-domains, the final  
127 meteorological fields are obtained by calculating the average of the overlapping grid  
128 points.

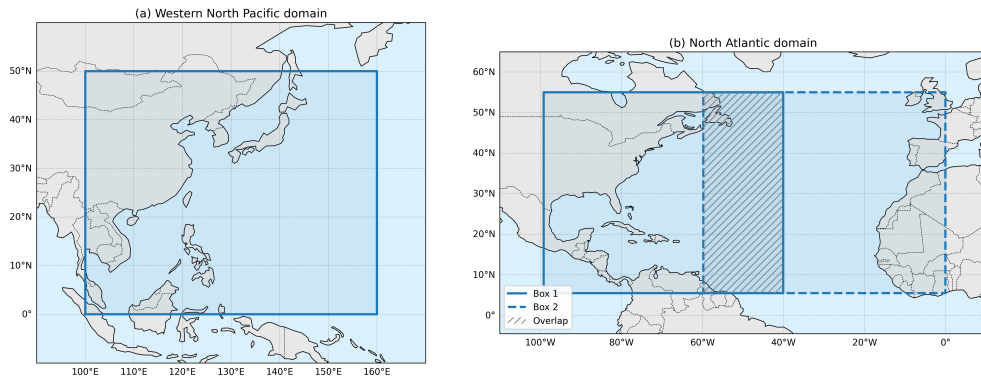

**Fig. 11** Domains used in this study. (a) The Western North Pacific (WNP) domain, (b) The North Atlantic (NA) domain. The NA domain is constructed by horizontally concatenating two overlapping sub-domains with identical size (Box 1, solid; Box 2, dashed), with the hatched area indicating the overlap region.

129 Within these defined domains, supplementary Figure 12 presents the track forecast  
 130 comparisons for four selected tropical cyclones cases. The first row displays Typhoons  
 131 Bebinca and Gaemi over the WNP, while the second row shows Hurricanes Beryl and  
 132 Helene over the NA. The results indicate that the track predictions of FuXi-TC-0.1°  
 133 (red line) are nearly identical to those of the baseline FuXi model (green line). For the  
 134 late-stage forecasts of Hurricane Beryl, the deviation of HRES-0.1° (light blue line)  
 135 from the International Best Track (black line) gradually increases with the extension  
 136 of the forecast lead time. Regarding Hurricanes Helene, the track forecasts generated  
 137 by the FuXi-series models exhibit slightly larger deviations in the predicted landfall  
 138 location.

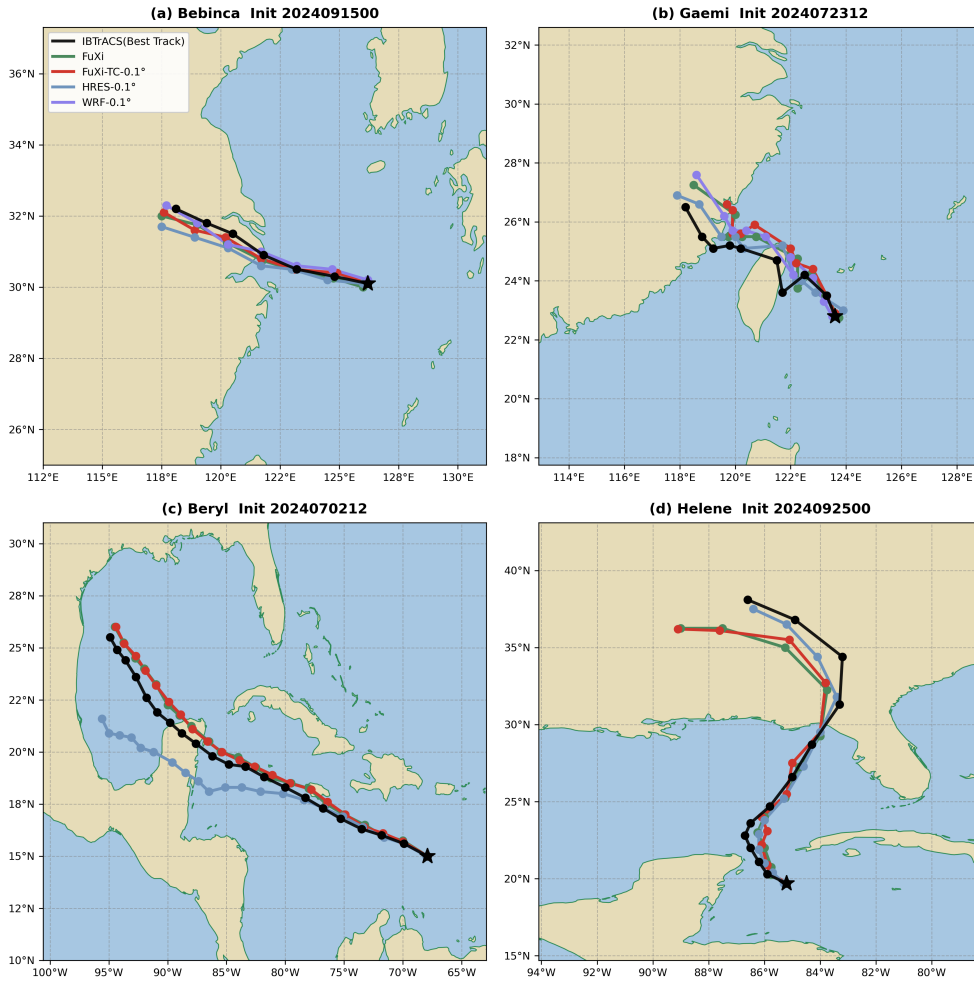

**Fig. 12** Track comparison of Typhoons (a) Bebinca, (b) Gaemi (c) Beryl and (d) Helene. Tracking results from FuXi (green line), FuXi-TC-0.1° (red line), HRES-0.1° (light blue line), and the observed Best Track (black line) are presented as lines with markers.

139 **References**

140 [1] Wu, L., Yu, R., Xiang, C., Yu, H., Feng, Y., Zhou, X.: Extreme Impacts of Four  
 141 Landfalling Tropical Cyclones in China during the 2024 Peak Season. Springer  
 142 (2025)
